# Supplementary material
Source: Elsevier journal article supplement (https://www.sciencedirect.com/science/article/pii/S1885585717303067)
Supplement: mmc1 [file mmc1.pdf]

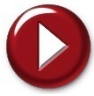

## Supplementary material

---

### Factors Influencing the Phenotypic Expression of Hypertrophic Cardiomyopathy in Genetic Carriers

---

#### METHODS OF THE SUPPLEMENTARY MATERIAL

#### METHODS

##### Cardiac Evaluation

Patients were interviewed and asked about symptoms, their history of hypertension, and regular physical exercise. Echocardiographic variables included the pattern of left ventricular hypertrophy; indexed left ventricular wall thickness; left ventricular mass (Devereaux); left ventricular systolic and diastolic diameters; left atrium diameter; left ventricular systolic and diastolic function (systolic dysfunction was considered if left ventricular ejection fraction was < 50%); left ventricular outflow tract gradient and the presence of mitral regurgitation. Left ventricular outflow tract obstruction was defined as a left ventricular outflow tract gradient > 30 mmHg. All patients were offered a 24-hour electrocardiogram-Holter and exercise test to complete sudden death risk stratification. Nonsustained ventricular tachycardia was assessed. Arrhythmic events and complications during follow-up were also recorded. Estimation of the sudden death risk rate at 5 years was calculated using the formula provided by O'Mahony et al.<sup>1</sup>

In the cohort there were 3 resuscitated cardiac arrests and 6 appropriate implantable cardioverter-defibrillator discharges, which were computed as sudden death equivalent for survival estimates.

After identification of the index case, family study was performed actively and all first-degree relatives were invited to participate in the cardiac evaluation and had the same opportunities to be screened.

The age of each event or age at last follow-up were used for survival analysis.

Hypertension was defined following the European Society of Hypertension and European Society of Cardiology recommendation.<sup>2</sup> At least 3 readings were taken for systolic blood pressure > 140 mmHg or diastolic blood pressure > 90 mmHg. Patients with a prior diagnosis of hypertension who were under chronic antihypertensive medication were considered as hypertensive for the purpose of the study.

Medication at the time of the first evaluation was recorded. Among hypertensive patients, medication consisted of beta-blockers in 43 (68.3%), calcium antagonists in 20 (31.7%), an angiotensin-converting enzyme inhibitor or angiotensin receptor blocker in 15 (23.8%),  $\alpha_1$ -blockers in 16 (25.4%), and diuretics in 27 (42.9%). More than 1 antihypertensive drug was used in 28 patients (44.4%).

All of the patients and their relatives were informed about their disease and gave written consent. This study was approved by the local ethics committee.

### **Genetic Tests**

Genomic DNA was extracted from peripheral blood samples using standard protocols. Sequencing of the most prevalent sarcomeric genes (2-5) included in all *MBPC3* and *MYH7* was performed using BigDye v1.1 chemistry in an ABI3130 analyzer (Applied Biosystems, Foster City) in 58 (80.5%) probands. In 23 (31.9%) of these, a genetic study was completed with sequencing of *TNNT2*, *TNNI3*, and *TPM1*. In the remaining 14 probands, (19.5%), the genetic study was considered complete when 1 of the founder mutations was identified. A predictive test was then offered to all first-degree relatives who were then screened for the mutation identified in the proband.

**REFERENCES**

1. O'Mahony C, Jichi F, Pavlou M, et al. A novel clinical risk prediction model for sudden cardiac death in hypertrophic cardiomyopathy (HCM risk-SCD). *Eur Heart J*. 2014;35:2010-2020.
2. Mancia G, De Backer GD, Dominiczak A, et al. 2007 Guidelines for the management of arterial hypertension. The Task Force for the Management of Arterial Hypertension of the European Society of Hypertension (ESH) and of the European Society of Cardiology (ESC). *Eur Heart J*. 2007;28:1462-1536.

**Table 1 of the supplementary material**

Frequency of Affected Carriers Vs Non-affected Carriers in the Different Group of Individuals

|                      | Sedentary              |                        | Moderate              |                      | Intense               |        | Not available        |                      | Total                   |                        |
|----------------------|------------------------|------------------------|-----------------------|----------------------|-----------------------|--------|----------------------|----------------------|-------------------------|------------------------|
|                      | Male                   | Female                 | Male                  | Female               | Male                  | Female | Male                 | Female               | Male                    | Female                 |
| <b>No HT</b>         | 67/19<br>(58.8%/16.7%) | 35/36<br>(34.3%/35.3%) | 10/3<br>(52.6%/15.8%) | 2/4<br>(33.3%/66.7%) | 8/2<br>(57.1%/14.3%)  | 0      | 2/1<br>(28.6%/14.3%) | 1/7<br>(11.1%/77.8%) | 87/25<br>(56.1%/16.1%)  | 38/47<br>(32.2%/39.8%) |
| <b>HT</b>            | 25/0<br>(21.9%/0%)     | 23/4<br>(22.5%/3.9%)   | 4/0<br>(21.1%/0%)     | 0                    | 3/1<br>(21.5%/7.1%)   | 0      | 2/0<br>(28.6%/0%)    | 1/0<br>(11.1%/0%)    | 34/1<br>(21.9%/0.6%)    | 24/4<br>(20.3%/3.4%)   |
| <b>Not available</b> | 3/0<br>(2.6%/0%)       | 3/1<br>(2.9%/1.0%)     | 1/1<br>(5.3%/5.3%)    | 0                    | 0                     | 0      | 2/1<br>(28.6%/14.3%) | 0                    | 6/2<br>(3.9%/1.3%)      | 3/1<br>(2.5%/0.8%)     |
| <b>Total</b>         | 95/19<br>(83.3%/16.7%) | 61/41<br>(59.8%/40.2%) | 15/4<br>(78.9%/21.1%) | 2/4<br>(33.3%/66.7%) | 11/3<br>(78.6%/21.4%) | 0      | 6/1<br>(85.7%/14.3%) | 2/7<br>(22.2%/77.8%) | 127/28<br>(81.9%/18.1%) | 66/52<br>(55.9%/44.1%) |

Each box represent “affected carrier/non-affected carrier”

HT, hypertension.

**Table 2 of the supplementary material**

Clinical Characteristics of Individuals Who Perform Intense or Competitive Exercise

|   | Age at evaluation | Gender | Age at diagnosis | Reason for diagnosis | Type of sport                                                                   | Duration of exercise                               | Max LVH | Obstruction | LVEDd | LA | Syncope | NYHA III-IV | AF  | Events                                                                                |
|---|-------------------|--------|------------------|----------------------|---------------------------------------------------------------------------------|----------------------------------------------------|---------|-------------|-------|----|---------|-------------|-----|---------------------------------------------------------------------------------------|
| 1 | 26                | Male   | 16               | Symptoms             | Cycling and weight lifting (>14 hours/week)                                     | Continues to practice sports to date               | 25      | No          | 45    | 39 | No      | No          | No  | ICD implanted. Device complications related to weight lifting, (last FU 27 years old) |
| 2 | 63                | Male   | 51               | Family screening     | Competitive tennis (>10 hours/week)                                             | Stopped tennis at 55 years old                     | 22      | Yes         | 44    | 34 | No      | No          | No  | No events (last FU 65 years old)                                                      |
| 3 | 29                | Male   | 27               | Family screening     | Running, swimming and cycling, training for military inclusion (>14 hours/week) | Reduced intensity at diagnosis, died 2 years later | 22      | No          | 65    | 55 | No      | Yes         | No  | Progressive dyspnea, dilatation, heart failure death at 29 years old                  |
| 4 | 14                | Male   | 14               | Family screening     | Soccer (>14 hours/week)                                                         | Continues to do sports to date                     | 13      | No          | 46    | 43 | No      | No          | No  | No events (last FU 15 years old)                                                      |
| 5 | 17                | Male   | 14               | Incidental           | Competitive Soccer and running (10 hours/week)                                  | Reduced intensity                                  | 27      | No          | 45    | 39 | No      | No          | No  | No events (last FU 17 years old)                                                      |
| 6 | 39                | Male   | 31               | Symptoms             | Soccer (>10 hours/week)                                                         | Reduced intensity                                  | 14      | No          | 44    | 45 | No      | No          | No  | No events (last FU 41 years old)                                                      |
| 7 | 60                | Male   | 47               | Symptoms             | Highly physical work + running (> 14 hours/week)                                | Stopped sports at diagnosis (aged 47)              | 21      | Yes         | 44    | 48 | No      | Yes         | Yes | ICD implanted 49 (last FU 61 years old)                                               |

|           |    |      |              |                  |                                                             |                                                    |    |     |    |    |     |     |     |                                         |
|-----------|----|------|--------------|------------------|-------------------------------------------------------------|----------------------------------------------------|----|-----|----|----|-----|-----|-----|-----------------------------------------|
| <b>8</b>  | 62 | Male | 44           | Family screening | Tennis and cycling (> 10 hours/week)                        | Reduced intensity (aged 52 years)                  | 22 | No  | 42 | 48 | Yes | No  | Yes | ICD implanted 52 (last FU 63 years old) |
| <b>9</b>  | 56 | Male | 45           | Symptoms         | Professional boxing, running and cycling (>10 hours/week)   | Reduced intensity before diagnosis (aged 49 years) | 18 | No  | 48 | 42 | Yes | No  | No  | No events (last FU 59 years old)        |
| <b>10</b> | 41 | Male | 25           | Family screening | Soccer and running (> 10 hours/week)                        | Stopped sports at diagnosis (aged 25 years old)    | 28 | No  | 45 | 30 | Yes | No  | No  | ICD recommended (last FU 42 years old)  |
| <b>11</b> | 66 | Male | 61           | Symptoms         | Cycling and running (> 10 hours/week)                       | Stopped sports before diagnosis (aged 35 years)    | 16 | Yes | 47 | 50 | Yes | Yes | No  | No events (last FU 67 years old)        |
| <b>12</b> | 24 | Male | Non-affected | Non-affected     | Professional athlete (> 14 hours/week)                      | Continues to do sports to date                     | 10 | No  | 44 | 35 | No  | No  | No  | No events (last FU 26 years old)        |
| <b>13</b> | 22 | Male | Non-affected | Non-affected     | Professional soccer (> 14 hours/week)                       | Continues to do sport to date                      | 11 | No  | 49 | 31 | No  | No  | No  | No events (last FU 22 years old)        |
| <b>14</b> | 66 | Male | Non-affected | Non-affected     | Professional soccer + running and cycling (> 14 hours/week) | Reduced intensity before diagnosis (aged 34 years) | 10 | No  | 42 | 36 | No  | No  | No  | No events (last FU 67 years old)        |

AF, atrial fibrillation; FU, follow-up; ICD, implantable cardioverter-defibrillator; LA, left atrium; LVEDd, left ventricular end diastolic diameter; LVH, left ventricular hypertrophy; NYHA, New York Heart Association class

**Table 3 of the supplementary material.**

Results of Multivariable Analysis of Survival (Cox and Laplace). Statistical Significant Variables Associated With the Event

| Event                 | variable          | Cox (HR)         |          | Laplace p50 (median) (years) |          |
|-----------------------|-------------------|------------------|----------|------------------------------|----------|
|                       |                   | value (95%CI)    | sig. (P) | value (95%CI)                | sig. (P) |
| <b>Stroke</b>         |                   |                  |          |                              |          |
|                       | LA diameter       | 1.10 (1.01-1.20) | .042     | -0.93 (-1.50 to -0.36)       | < .001   |
|                       | Type of gene      |                  |          | -20.71 (-33.23 to -8.20)     | < .001   |
| <b>AF</b>             |                   |                  |          |                              |          |
|                       | LA diameter       | 1.09 (1.05-1.14) | < .001   | -1.28 (-1.68 to -0.88)       | < .001   |
| <b>NYHA III-IV</b>    |                   |                  |          |                              |          |
|                       | LA diameter       | 1.07 (1.02-1.12) | .002     | -1.02 (-1.68 to -0.36)       | .002     |
|                       | Physical activity |                  |          | -14.11 (-24.10-4.11)         | .006     |
|                       | Male gender       |                  |          | 9.97 (1.21-18.70)            | .026     |
|                       | HT                |                  |          | 10.38 (1.71-19.66)           | .019     |
| <b>SD</b>             |                   |                  |          |                              |          |
|                       | LVH               | 1.10 (1.01-1.20) | .039     |                              |          |
|                       | LA diameter       | 1.07 (1.03-1.10) | < .001   |                              |          |
| <b>Combined event</b> |                   |                  |          |                              |          |
|                       | LA diameter       | 1.07 (1.03-1.10) | < .001   | -0.70 (-1.19 to -0.20)       | .006     |

95%CI, 95% confidence interval; AF, atrial fibrillation; HT, hypertension; LA, left atrial diameter (mm); LVH, left ventricular hypertrophy; NYHA, New York Heart Association class; SD, sudden death.

Combined event, includes stroke, AF, NYHA III-IV. SD equivalent includes sudden death, resuscitated cardiac arrest and implantable cardioverter-defibrillator therapy. LVH, indexed maximal left ventricular hypertrophy (mm/m<sup>2</sup>). Type of gene where mutation is located (*MYBPC3* vs *MYH7*).

Variables included in the model: physical activity, gender, HT, Type of gene, obstruction, maximal wall thickness (indexed in mm/m<sup>2</sup>), and LA diameter (mm).
